# Supplementary material for: Determinants of Self-Care and Home-Based Management of Hypertension: An Integrative Review
Source: Glob Heart. 2023 Mar 20;18(1):16. doi: 10.5334/gh.1190 (PMC10038107; doi:10.5334/gh.1190)
Supplement: Supplementary File. — Results of quality appraisal using the mixed methods appraisal tool. [file gh-18-1-1190-s1.pdf]

### Results of quality appraisal using the mixed methods appraisal tool

| QUANTITATIVE DESCRIPTIVE STUDY |                                  |                                     |                                                                |                                                                     |                                                        |                                   |                                      |                                                                          |
|--------------------------------|----------------------------------|-------------------------------------|----------------------------------------------------------------|---------------------------------------------------------------------|--------------------------------------------------------|-----------------------------------|--------------------------------------|--------------------------------------------------------------------------|
|                                |                                  | Screening questions                 |                                                                | Appraisal questions                                                 |                                                        |                                   |                                      |                                                                          |
| Citation                       | Specific study design            | Are there clear research questions? | Do the collected data allow to address the research questions? | Is the sampling strategy relevant to address the research question? | Is the sample representative of the target population? | Are the measurements appropriate? | Is the risk of nonresponse bias low? | Is the statistical analysis appropriate to answer the research question? |
| Maginga et al., 2015           | Cross sectional                  | Yes                                 | Yes                                                            | No                                                                  | Yes                                                    | Yes                               | Yes                                  | Yes                                                                      |
| Berhe et al., 2017             | A retrospective cohort           | Yes                                 | Yes                                                            | Yes                                                                 | Yes                                                    | Yes                               | Yes                                  | Yes                                                                      |
| Labata et al., 2019            | Hospital-based cross-sectional   | Yes                                 | Yes                                                            | Yes                                                                 | Yes                                                    | Yes                               | Yes                                  | Yes                                                                      |
| Niriayo et al., 2019           | Cross sectional                  | Yes                                 | Yes                                                            | Yes                                                                 | Yes                                                    | Yes                               | Yes                                  | Yes                                                                      |
| Berhe et al., 2020             | Hospital-based cross-sectional   | Yes                                 | Yes                                                            | Yes                                                                 | Yes                                                    | Yes                               | Yes                                  | Yes                                                                      |
| Gebremichael et al., 2019      | Hospital-based cross-sectional   | Yes                                 | Yes                                                            | Yes                                                                 | Yes                                                    | Yes                               | Yes                                  | Yes                                                                      |
| Okai et al., 2020              | Cross sectional                  | Yes                                 | Yes                                                            | Yes                                                                 | Yes                                                    | Yes                               | Yes                                  | Yes                                                                      |
| Adidja et al., 2018            | Community-based cross-sectional  | Yes                                 | Yes                                                            | Yes                                                                 | Yes                                                    | Yes                               | Yes                                  | Yes                                                                      |
| Ware et al., 2019              | Cross-sectional within a cohort  | Yes                                 | Yes                                                            | Yes                                                                 | Yes                                                    | Yes                               | Yes                                  | Yes                                                                      |
| Mohamed et al., 2018           | Cross-sectional household survey | Yes                                 | Yes                                                            | Yes                                                                 | Yes                                                    | Yes                               | Yes                                  | Yes                                                                      |

|                              |                                                          |                                     |                                                                |                                                                                                   |                                                                                                   |                                                                                                       |                                                                                                        |                                                                                                                    |
|------------------------------|----------------------------------------------------------|-------------------------------------|----------------------------------------------------------------|---------------------------------------------------------------------------------------------------|---------------------------------------------------------------------------------------------------|-------------------------------------------------------------------------------------------------------|--------------------------------------------------------------------------------------------------------|--------------------------------------------------------------------------------------------------------------------|
| Adeniyi et al., 2016         | Cross-sectional                                          | Yes                                 | Yes                                                            | No                                                                                                | Yes                                                                                               | Yes                                                                                                   | Yes                                                                                                    | Yes                                                                                                                |
| <b>QUALITATIVE STUDY</b>     |                                                          |                                     |                                                                |                                                                                                   |                                                                                                   |                                                                                                       |                                                                                                        |                                                                                                                    |
|                              | Specific design                                          | Are there clear research questions? | Do the collected data allow to address the research questions? | Is the qualitative approach appropriate to answer the research question?                          | Are the qualitative data collection methods adequate to address the research question?            | Are the findings adequately derived from the data?                                                    | Is the interpretation of results sufficiently substantiated by data?                                   | Is there coherence between qualitative data sources, collection, analysis and interpretation ?                     |
| Gebrezgi et al., 2017        | Qualitative                                              | Yes                                 | Yes                                                            | Yes                                                                                               | Yes                                                                                               | Yes                                                                                                   | Yes                                                                                                    | Yes                                                                                                                |
| <b>MIXED METHODS STUDIES</b> |                                                          |                                     |                                                                |                                                                                                   |                                                                                                   |                                                                                                       |                                                                                                        |                                                                                                                    |
| citation                     | Specific design                                          | Are there clear research questions? | Do the collected data allow to address the research questions? | Is there an adequate rationale for using a mixed methods design to address the research question? | Are the different components of the study effectively integrated to answer the research question? | Are the outputs of the integration of qualitative and quantitative components adequately interpreted? | Are divergences and inconsistencies between quantitative and qualitative results adequately addressed? | Do the different components of the study adhere to the quality criteria of each tradition of the methods involved? |
| Herskind et al., 2019        | Retrospective chart review and survey:<br>a mixed-method | Yes                                 | Yes                                                            | Yes                                                                                               | Yes                                                                                               | Yes                                                                                                   | Yes                                                                                                    | Yes                                                                                                                |
